# Supplementary material
Source: publisher figshare collection journal article supplement (https://acs.figshare.com/ndownloader/files/4754218)
Supplement: Supplementary file 1 [file 4754218]

  
data_5dpe113 
  
_audit_creation_method            SHELXL-97 
_chemical_name_systematic 
; 
 ? 
; 
_chemical_name_common             ? 
_chemical_melting_point           ? 
_chemical_formula_moiety          ? 
_chemical_formula_sum 
 'C35 H32 N2 O6' 
_chemical_formula_weight          576.63 
  
loop_ 
 _atom_type_symbol 
 _atom_type_description 
 _atom_type_scat_dispersion_real 
 _atom_type_scat_dispersion_imag 
 _atom_type_scat_source 
 'C'  'C'   0.0033   0.0016 
 'International Tables Vol C Tables 4.2.6.8 and 6.1.1.4' 
 'H'  'H'   0.0000   0.0000 
 'International Tables Vol C Tables 4.2.6.8 and 6.1.1.4' 
 'N'  'N'   0.0061   0.0033 
 'International Tables Vol C Tables 4.2.6.8 and 6.1.1.4' 
 'O'  'O'   0.0106   0.0060 
 'International Tables Vol C Tables 4.2.6.8 and 6.1.1.4' 
  
_symmetry_cell_setting            Monoclinic 
_symmetry_space_group_name_H-M    P2(1)/n 
  
loop_ 
 _symmetry_equiv_pos_as_xyz 
 'x, y, z' 
 '-x+1/2, y+1/2, -z+1/2' 
 '-x, -y, -z' 
 'x-1/2, -y-1/2, z-1/2' 
  
_cell_length_a                    21.6669(15) 
_cell_length_b                    9.9002(7) 
_cell_length_c                    29.684(2) 
_cell_angle_alpha                 90.00 
_cell_angle_beta                  110.1140(10) 
_cell_angle_gamma                 90.00 
_cell_volume                      5979.0(7) 
_cell_formula_units_Z             8 
_cell_measurement_temperature     293(2) 
_cell_measurement_reflns_used     ? 
_cell_measurement_theta_min       ? 
_cell_measurement_theta_max       ? 
  
_exptl_crystal_description        prismatic 
_exptl_crystal_colour             yellow 
_exptl_crystal_size_max           0.47 
_exptl_crystal_size_mid           0.33 
_exptl_crystal_size_min           0.20 
_exptl_crystal_density_meas       ? 
_exptl_crystal_density_diffrn     1.281 
_exptl_crystal_density_method     'not measured' 
_exptl_crystal_F_000              2432 
_exptl_absorpt_coefficient_mu     0.088 
_exptl_absorpt_correction_type    none 
_exptl_absorpt_correction_T_min   ? 
_exptl_absorpt_correction_T_max   ? 
_exptl_absorpt_process_details    ? 
  
_exptl_special_details 
; 
 ? 
; 
  
_diffrn_ambient_temperature       293(2) 
_diffrn_radiation_wavelength      0.71073 
_diffrn_radiation_type            MoK\a 
_diffrn_radiation_source          'fine-focus sealed tube' 
_diffrn_radiation_monochromator   graphite 
_diffrn_measurement_device_type   'CCD area detector' 
_diffrn_measurement_method        'phi and omega scans' 
_diffrn_detector_area_resol_mean  ? 
_diffrn_standards_number          ? 
_diffrn_standards_interval_count  ? 
_diffrn_standards_interval_time   ? 
_diffrn_standards_decay_%         ? 
_diffrn_reflns_number             44944 
_diffrn_reflns_av_R_equivalents   0.0691 
_diffrn_reflns_av_sigmaI/netI     0.0840 
_diffrn_reflns_limit_h_min        -25 
_diffrn_reflns_limit_h_max        20 
_diffrn_reflns_limit_k_min        -11 
_diffrn_reflns_limit_k_max        11 
_diffrn_reflns_limit_l_min        -33 
_diffrn_reflns_limit_l_max        35 
_diffrn_reflns_theta_min          1.02 
_diffrn_reflns_theta_max          25.00 
_reflns_number_total              10525 
_reflns_number_gt                 4222 
_reflns_threshold_expression      >2sigma(I) 
  
_computing_data_collection        'Bruker SMART' 
_computing_cell_refinement        'Bruker SMART' 
_computing_data_reduction         'Bruker SHELXTL' 
_computing_structure_solution     'SHELXS-97 (Sheldrick, 1990)' 
_computing_structure_refinement   'SHELXL-97 (Sheldrick, 1997)' 
_computing_molecular_graphics     'Bruker SHELXTL' 
_computing_publication_material   'Bruker SHELXTL' 
  
_refine_special_details 
; 
 Refinement of F^2^ against ALL reflections.  The weighted R-factor wR and 
 goodness of fit S are based on F^2^, conventional R-factors R are based 
 on F, with F set to zero for negative F^2^. The threshold expression of 
 F^2^ > 2sigma(F^2^) is used only for calculating R-factors(gt) etc. and is 
 not relevant to the choice of reflections for refinement.  R-factors based 
 on F^2^ are statistically about twice as large as those based on F, and R- 
 factors based on ALL data will be even larger. 
; 
  
_refine_ls_structure_factor_coef  Fsqd 
_refine_ls_matrix_type            full 
_refine_ls_weighting_scheme       calc 
_refine_ls_weighting_details 
 'calc w=1/[\s^2^(Fo^2^)+(0.0608P)^2^+0.0000P] where P=(Fo^2^+2Fc^2^)/3' 
_atom_sites_solution_primary      direct 
_atom_sites_solution_secondary    difmap 
_atom_sites_solution_hydrogens    geom 
_refine_ls_hydrogen_treatment     constr 
_refine_ls_extinction_method      SHELXL 
_refine_ls_extinction_coef        0.00043(15) 
_refine_ls_extinction_expression 
 'Fc^*^=kFc[1+0.001xFc^2^\l^3^/sin(2\q)]^-1/4^' 
_refine_ls_number_reflns          10525 
_refine_ls_number_parameters      776 
_refine_ls_number_restraints      0 
_refine_ls_R_factor_all           0.1407 
_refine_ls_R_factor_gt            0.0439 
_refine_ls_wR_factor_ref          0.1402 
_refine_ls_wR_factor_gt           0.1063 
_refine_ls_goodness_of_fit_ref    0.892 
_refine_ls_restrained_S_all       0.892 
_refine_ls_shift/su_max           0.083 
_refine_ls_shift/su_mean          0.009 
  
loop_ 
 _atom_site_label 
 _atom_site_type_symbol 
 _atom_site_fract_x 
 _atom_site_fract_y 
 _atom_site_fract_z 
 _atom_site_U_iso_or_equiv 
 _atom_site_adp_type 
 _atom_site_occupancy 
 _atom_site_symmetry_multiplicity 
 _atom_site_calc_flag 
 _atom_site_refinement_flags 
 _atom_site_disorder_assembly 
 _atom_site_disorder_group 
N1 N -0.03619(12) 0.3202(2) 0.14687(8) 0.0557(7) Uani 1 1 d . . . 
N1' N 0.15071(11) 0.3638(2) 0.25702(8) 0.0548(7) Uani 1 1 d . . . 
O1 O -0.13627(11) 0.3776(2) 0.15499(9) 0.0877(8) Uani 1 1 d . . . 
O2 O -0.15046(9) 0.2071(2) 0.06104(8) 0.0632(6) Uani 1 1 d . . . 
O3 O 0.05850(10) 0.0189(2) 0.10635(7) 0.0622(6) Uani 1 1 d . . . 
O1' O 0.14191(11) 0.3929(2) 0.33311(8) 0.0762(7) Uani 1 1 d . . . 
O2' O 0.24664(9) 0.1616(2) 0.32756(7) 0.0694(6) Uani 1 1 d . . . 
O3' O 0.18379(10) 0.0879(2) 0.16979(7) 0.0624(6) Uani 1 1 d . . . 
C1 C 0.01333(14) 0.3803(3) 0.18816(10) 0.0616(9) Uani 1 1 d . . . 
H1A H 0.0277 0.3131 0.2134 0.074 Uiso 1 1 calc R . . 
H1B H -0.0066 0.4539 0.1999 0.074 Uiso 1 1 calc R . . 
C2 C -0.10091(17) 0.3117(3) 0.13976(12) 0.0615(9) Uani 1 1 d . . . 
C3 C -0.10898(14) 0.1867(3) 0.10838(11) 0.0581(8) Uani 1 1 d . . . 
H3 H -0.1214 0.1069 0.1228 0.070 Uiso 1 1 calc R . . 
C4 C -0.03298(14) 0.1959(3) 0.12000(10) 0.0535(8) Uani 1 1 d . . . 
H4 H -0.0100 0.1234 0.1418 0.064 Uiso 1 1 calc R . . 
C5 C -0.17459(14) 0.0977(3) 0.03212(11) 0.0544(8) Uani 1 1 d . . . 
C6 C -0.22065(15) 0.1264(4) -0.01177(12) 0.0624(9) Uani 1 1 d . . . 
H6 H -0.2311 0.2156 -0.0210 0.075 Uiso 1 1 calc R . . 
C7 C -0.25146(16) 0.0229(4) -0.04211(12) 0.0693(10) Uani 1 1 d . . . 
H7 H -0.2831 0.0427 -0.0717 0.083 Uiso 1 1 calc R . . 
C8 C -0.23577(17) -0.1102(4) -0.02904(13) 0.0721(10) Uani 1 1 d . . . 
H8 H -0.2570 -0.1803 -0.0493 0.087 Uiso 1 1 calc R . . 
C9 C -0.18813(16) -0.1364(3) 0.01440(12) 0.0678(9) Uani 1 1 d . . . 
H9 H -0.1765 -0.2255 0.0233 0.081 Uiso 1 1 calc R . . 
C10 C -0.15725(14) -0.0345(3) 0.04502(11) 0.0582(8) Uani 1 1 d . . . 
H10 H -0.1249 -0.0542 0.0743 0.070 Uiso 1 1 calc R . . 
C11 C -0.00847(14) 0.2093(3) 0.07876(10) 0.0515(8) Uani 1 1 d . . . 
C12 C 0.03594(14) 0.1168(3) 0.07164(10) 0.0501(8) Uani 1 1 d . . . 
C13 C 0.05467(15) 0.1230(3) 0.03170(11) 0.0644(9) Uani 1 1 d . . . 
H13 H 0.0845 0.0609 0.0276 0.077 Uiso 1 1 calc R . . 
C14 C 0.02892(17) 0.2216(4) -0.00174(12) 0.0744(10) Uani 1 1 d . . . 
H14 H 0.0409 0.2250 -0.0290 0.089 Uiso 1 1 calc R . . 
C15 C -0.01434(17) 0.3157(4) 0.00413(12) 0.0760(10) Uani 1 1 d . . . 
H15 H -0.0310 0.3833 -0.0186 0.091 Uiso 1 1 calc R . . 
C16 C -0.03264(15) 0.3083(3) 0.04434(12) 0.0680(9) Uani 1 1 d . . . 
H16 H -0.0620 0.3717 0.0483 0.082 Uiso 1 1 calc R . . 
C17 C 0.11618(16) -0.0555(3) 0.10984(11) 0.0632(9) Uani 1 1 d . . . 
H17A H 0.1104 -0.0966 0.0790 0.076 Uiso 1 1 calc R . . 
H17B H 0.1217 -0.1277 0.1330 0.076 Uiso 1 1 calc R . . 
C18 C 0.07282(14) 0.4337(3) 0.17860(10) 0.0567(8) Uani 1 1 d . . . 
H18A H 0.0905 0.3640 0.1635 0.068 Uiso 1 1 calc R . . 
H18B H 0.0602 0.5099 0.1568 0.068 Uiso 1 1 calc R . . 
C1' C 0.12530(14) 0.4778(3) 0.22535(10) 0.0605(9) Uani 1 1 d . . . 
H1'1 H 0.1611 0.5212 0.2183 0.073 Uiso 1 1 calc R . . 
H1'2 H 0.1067 0.5432 0.2414 0.073 Uiso 1 1 calc R . . 
C2' C 0.15506(14) 0.3316(3) 0.30213(11) 0.0564(8) Uani 1 1 d . . . 
C3' C 0.18151(14) 0.1902(3) 0.29751(10) 0.0552(8) Uani 1 1 d . . . 
H3' H 0.1506 0.1183 0.2980 0.066 Uiso 1 1 calc R . . 
C4' C 0.17475(14) 0.2339(3) 0.24566(10) 0.0544(8) Uani 1 1 d . . . 
H4' H 0.1393 0.1839 0.2219 0.065 Uiso 1 1 calc R . . 
C5' C 0.25391(17) 0.1002(3) 0.37074(12) 0.0627(9) Uani 1 1 d . . . 
C6' C 0.31428(19) 0.0446(4) 0.39387(15) 0.0944(12) Uani 1 1 d . . . 
H6' H 0.3469 0.0479 0.3802 0.113 Uiso 1 1 calc R . . 
C7' C 0.3263(2) -0.0170(4) 0.43818(18) 0.1126(15) Uani 1 1 d . . . 
H7' H 0.3671 -0.0557 0.4542 0.135 Uiso 1 1 calc R . . 
C8' C 0.2777(3) -0.0209(4) 0.45850(16) 0.1078(15) Uani 1 1 d . . . 
H8' H 0.2860 -0.0603 0.4884 0.129 Uiso 1 1 calc R . . 
C9' C 0.2185(2) 0.0324(4) 0.43478(14) 0.0911(12) Uani 1 1 d . . . 
H9' H 0.1855 0.0279 0.4481 0.109 Uiso 1 1 calc R . . 
C10' C 0.20589(18) 0.0939(3) 0.39090(12) 0.0736(10) Uani 1 1 d . . . 
H10' H 0.1647 0.1310 0.3750 0.088 Uiso 1 1 calc R . . 
C11' C 0.23351(15) 0.2451(3) 0.23018(10) 0.0531(8) Uani 1 1 d . . . 
C12' C 0.23565(16) 0.1736(3) 0.19041(10) 0.0546(8) Uani 1 1 d . . . 
C13' C 0.28767(17) 0.1903(4) 0.17400(11) 0.0676(9) Uani 1 1 d . . . 
H13' H 0.2887 0.1429 0.1472 0.081 Uiso 1 1 calc R . . 
C14' C 0.33818(17) 0.2777(4) 0.19761(13) 0.0772(10) Uani 1 1 d . . . 
H14' H 0.3732 0.2889 0.1867 0.093 Uiso 1 1 calc R . . 
C15' C 0.33694(17) 0.3478(3) 0.23701(13) 0.0747(10) Uani 1 1 d . . . 
H15' H 0.3713 0.4056 0.2530 0.090 Uiso 1 1 calc R . . 
C16' C 0.28458(17) 0.3325(3) 0.25284(11) 0.0668(9) Uani 1 1 d . . . 
H16' H 0.2836 0.3817 0.2792 0.080 Uiso 1 1 calc R . . 
C17' C 0.17720(16) 0.0286(3) 0.12453(10) 0.0639(9) Uani 1 1 d . . . 
H17C H 0.2152 -0.0271 0.1273 0.077 Uiso 1 1 calc R . . 
H17D H 0.1738 0.0984 0.1009 0.077 Uiso 1 1 calc R . . 
N2 N 0.52886(12) 0.7231(3) 0.18544(9) 0.0654(8) Uani 1 1 d . . . 
N2' N 0.72365(14) 0.8589(3) 0.23283(10) 0.0955(11) Uani 1 1 d . . . 
O4 O 0.47241(11) 0.6279(2) 0.23249(8) 0.0776(7) Uani 1 1 d . . . 
O5 O 0.46464(10) 0.4409(2) 0.14460(7) 0.0653(6) Uani 1 1 d . . . 
O6 O 0.59061(11) 0.5765(2) 0.07736(7) 0.0694(6) Uani 1 1 d . . . 
O4' O 0.80752(13) 0.9183(4) 0.30445(9) 0.1371(13) Uani 1 1 d . . . 
O5' O 0.86483(11) 0.8795(3) 0.22076(9) 0.0886(8) Uani 1 1 d . . . 
O6' O 0.69381(12) 0.7639(3) 0.09500(8) 0.0910(8) Uani 1 1 d . . . 
C19 C 0.53944(17) 0.8671(4) 0.19605(12) 0.0784(10) Uani 1 1 d . . . 
H19A H 0.5337 0.8861 0.2264 0.094 Uiso 1 1 calc R . . 
H19B H 0.5067 0.9184 0.1713 0.094 Uiso 1 1 calc R . . 
C20 C 0.50043(15) 0.6258(4) 0.20319(11) 0.0638(9) Uani 1 1 d . . . 
C21 C 0.51847(15) 0.5169(3) 0.17367(11) 0.0633(9) Uani 1 1 d . . . 
H21 H 0.5543 0.4593 0.1934 0.076 Uiso 1 1 calc R . . 
C22 C 0.54409(14) 0.6357(3) 0.15002(10) 0.0627(9) Uani 1 1 d . . . 
H22 H 0.5914 0.6296 0.1559 0.075 Uiso 1 1 calc R . . 
C23 C 0.47755(16) 0.3254(4) 0.12353(11) 0.0575(8) Uani 1 1 d . . . 
C24 C 0.42362(17) 0.2478(4) 0.09930(12) 0.0718(10) Uani 1 1 d . . . 
H24 H 0.3818 0.2759 0.0972 0.086 Uiso 1 1 calc R . . 
C25 C 0.4318(2) 0.1293(4) 0.07827(13) 0.0868(11) Uani 1 1 d . . . 
H25 H 0.3952 0.0767 0.0622 0.104 Uiso 1 1 calc R . . 
C26 C 0.4932(2) 0.0870(4) 0.08067(13) 0.0864(11) Uani 1 1 d . . . 
H26 H 0.4986 0.0063 0.0664 0.104 Uiso 1 1 calc R . . 
C27 C 0.54645(18) 0.1654(4) 0.10440(13) 0.0735(10) Uani 1 1 d . . . 
H27 H 0.5882 0.1369 0.1064 0.088 Uiso 1 1 calc R . . 
C28 C 0.53939(16) 0.2862(4) 0.12550(11) 0.0639(9) Uani 1 1 d . . . 
H28 H 0.5758 0.3400 0.1407 0.077 Uiso 1 1 calc R . . 
C29 C 0.50539(15) 0.6685(3) 0.09910(11) 0.0560(8) Uani 1 1 d . . . 
C30 C 0.53073(16) 0.6396(3) 0.06291(11) 0.0564(8) Uani 1 1 d . . . 
C31 C 0.49548(17) 0.6726(3) 0.01567(11) 0.0692(9) Uani 1 1 d . . . 
H31 H 0.5132 0.6555 -0.0082 0.083 Uiso 1 1 calc R . . 
C32 C 0.43435(18) 0.7306(4) 0.00413(12) 0.0761(10) Uani 1 1 d . . . 
H32 H 0.4105 0.7510 -0.0277 0.091 Uiso 1 1 calc R . . 
C33 C 0.40839(16) 0.7586(3) 0.03892(13) 0.0709(10) Uani 1 1 d . . . 
H33 H 0.3671 0.7980 0.0310 0.085 Uiso 1 1 calc R . . 
C34 C 0.44403(16) 0.7279(3) 0.08574(12) 0.0663(9) Uani 1 1 d . . . 
H34 H 0.4262 0.7477 0.1094 0.080 Uiso 1 1 calc R . . 
C35 C 0.63142(17) 0.5872(4) 0.04881(12) 0.0790(11) Uani 1 1 d . . . 
H35A H 0.6070 0.5569 0.0165 0.095 Uiso 1 1 calc R . . 
H35B H 0.6691 0.5281 0.0619 0.095 Uiso 1 1 calc R . . 
C36 C 0.60666(16) 0.9121(4) 0.19862(12) 0.0826(11) Uani 1 1 d . . . 
H36A H 0.6094 1.0096 0.2019 0.099 Uiso 1 1 calc R . . 
H36B H 0.6132 0.8886 0.1688 0.099 Uiso 1 1 calc R . . 
C19' C 0.66007(17) 0.8501(4) 0.23932(12) 0.1014(14) Uani 1 1 d . . . 
H19C H 0.6626 0.8955 0.2689 0.122 Uiso 1 1 calc R . . 
H19D H 0.6497 0.7559 0.2423 0.122 Uiso 1 1 calc R . . 
C20' C 0.7854(2) 0.8734(5) 0.26411(15) 0.1033(15) Uani 1 1 d . . . 
C21' C 0.81265(17) 0.8089(4) 0.22838(13) 0.0941(13) Uani 1 1 d . . . 
H21' H 0.8248 0.7145 0.2369 0.113 Uiso 1 1 calc R . . 
C22' C 0.74135(16) 0.8190(4) 0.19176(12) 0.0841(11) Uani 1 1 d . . . 
H22' H 0.7229 0.7315 0.1783 0.101 Uiso 1 1 calc R . . 
C23' C 0.8935(2) 0.8208(4) 0.19068(14) 0.0790(11) Uani 1 1 d . . . 
C24' C 0.9535(2) 0.8738(4) 0.19325(14) 0.0897(12) Uani 1 1 d . . . 
H24' H 0.9726 0.9433 0.2146 0.108 Uiso 1 1 calc R . . 
C25' C 0.9846(2) 0.8219(6) 0.16369(18) 0.1078(15) Uani 1 1 d . . . 
H25' H 1.0256 0.8553 0.1656 0.129 Uiso 1 1 calc R . . 
C26' C 0.9557(3) 0.7207(5) 0.13121(17) 0.1092(16) Uani 1 1 d . . . 
H26' H 0.9765 0.6871 0.1109 0.131 Uiso 1 1 calc R . . 
C27' C 0.8960(3) 0.6708(4) 0.12938(17) 0.1034(14) Uani 1 1 d . . . 
H27' H 0.8765 0.6018 0.1079 0.124 Uiso 1 1 calc R . . 
C28' C 0.8643(2) 0.7204(4) 0.15861(16) 0.0944(12) Uani 1 1 d . . . 
H28' H 0.8235 0.6863 0.1567 0.113 Uiso 1 1 calc R . . 
C29' C 0.73072(15) 0.9286(4) 0.15415(12) 0.0701(10) Uani 1 1 d . . . 
C30' C 0.70702(15) 0.8968(4) 0.10565(13) 0.0706(10) Uani 1 1 d . . . 
C31' C 0.69879(15) 0.9978(4) 0.07152(12) 0.0714(10) Uani 1 1 d . . . 
H31' H 0.6824 0.9766 0.0390 0.086 Uiso 1 1 calc R . . 
C32' C 0.71501(16) 1.1289(4) 0.08597(15) 0.0787(11) Uani 1 1 d . . . 
H32' H 0.7105 1.1957 0.0630 0.094 Uiso 1 1 calc R . . 
C33' C 0.73754(16) 1.1625(4) 0.13319(15) 0.0851(11) Uani 1 1 d . . . 
H33' H 0.7476 1.2517 0.1428 0.102 Uiso 1 1 calc R . . 
C34' C 0.74513(17) 1.0610(5) 0.16675(13) 0.0862(12) Uani 1 1 d . . . 
H34' H 0.7606 1.0837 0.1991 0.103 Uiso 1 1 calc R . . 
C35' C 0.65492(17) 0.7283(4) 0.04687(12) 0.0840(11) Uani 1 1 d . . . 
H35C H 0.6811 0.7328 0.0262 0.101 Uiso 1 1 calc R . . 
H35D H 0.6179 0.7894 0.0345 0.101 Uiso 1 1 calc R . . 
  
loop_ 
 _atom_site_aniso_label 
 _atom_site_aniso_U_11 
 _atom_site_aniso_U_22 
 _atom_site_aniso_U_33 
 _atom_site_aniso_U_23 
 _atom_site_aniso_U_13 
 _atom_site_aniso_U_12 
N1 0.0467(17) 0.0589(17) 0.0596(16) -0.0088(14) 0.0158(13) -0.0040(14) 
N1' 0.0556(17) 0.0553(17) 0.0451(16) -0.0066(13) 0.0064(13) 0.0090(13) 
O1 0.0695(17) 0.0780(17) 0.132(2) -0.0278(15) 0.0564(16) -0.0077(14) 
O2 0.0540(14) 0.0523(14) 0.0769(16) 0.0031(12) 0.0142(12) -0.0039(11) 
O3 0.0639(15) 0.0666(15) 0.0587(14) 0.0048(12) 0.0246(11) 0.0124(12) 
O1' 0.0890(17) 0.0786(17) 0.0651(15) -0.0137(13) 0.0319(13) 0.0102(13) 
O2' 0.0469(14) 0.0950(18) 0.0642(14) 0.0097(13) 0.0166(11) 0.0101(12) 
O3' 0.0706(15) 0.0747(15) 0.0465(12) -0.0122(11) 0.0261(11) -0.0058(13) 
C1 0.062(2) 0.071(2) 0.0517(19) 0.0014(17) 0.0184(17) 0.0002(18) 
C2 0.051(2) 0.053(2) 0.085(2) -0.0010(19) 0.0294(19) -0.0029(18) 
C3 0.050(2) 0.055(2) 0.070(2) -0.0002(18) 0.0214(17) -0.0027(17) 
C4 0.051(2) 0.048(2) 0.063(2) 0.0046(17) 0.0216(16) 0.0030(16) 
C5 0.042(2) 0.058(2) 0.064(2) 0.0002(19) 0.0204(17) -0.0008(17) 
C6 0.059(2) 0.073(3) 0.061(2) 0.011(2) 0.0279(19) 0.0091(19) 
C7 0.052(2) 0.107(3) 0.051(2) -0.002(2) 0.0207(17) 0.008(2) 
C8 0.065(3) 0.084(3) 0.072(3) -0.019(2) 0.029(2) -0.010(2) 
C9 0.067(2) 0.065(2) 0.069(2) -0.007(2) 0.021(2) -0.001(2) 
C10 0.051(2) 0.057(2) 0.061(2) 0.0017(19) 0.0124(16) 0.0048(18) 
C11 0.0460(19) 0.052(2) 0.056(2) 0.0048(17) 0.0167(16) -0.0037(16) 
C12 0.0473(19) 0.056(2) 0.0428(18) -0.0022(16) 0.0098(15) -0.0037(17) 
C13 0.060(2) 0.081(3) 0.050(2) 0.0020(19) 0.0157(17) -0.0008(19) 
C14 0.066(2) 0.102(3) 0.056(2) 0.005(2) 0.0215(19) -0.013(2) 
C15 0.070(3) 0.086(3) 0.067(2) 0.026(2) 0.017(2) 0.000(2) 
C16 0.063(2) 0.067(2) 0.077(2) 0.009(2) 0.0277(19) 0.0037(19) 
C17 0.064(2) 0.065(2) 0.060(2) -0.0094(17) 0.0208(17) 0.013(2) 
C18 0.053(2) 0.063(2) 0.0512(19) 0.0058(16) 0.0142(16) -0.0025(17) 
C1' 0.056(2) 0.056(2) 0.059(2) -0.0028(17) 0.0063(17) 0.0000(17) 
C2' 0.052(2) 0.064(2) 0.050(2) -0.0091(18) 0.0132(16) -0.0011(17) 
C3' 0.047(2) 0.063(2) 0.0526(19) -0.0037(16) 0.0133(16) 0.0020(17) 
C4' 0.051(2) 0.056(2) 0.0506(19) -0.0099(16) 0.0112(16) 0.0051(16) 
C5' 0.061(2) 0.057(2) 0.063(2) 0.0009(18) 0.012(2) 0.0096(19) 
C6' 0.062(3) 0.103(3) 0.103(3) 0.019(3) 0.009(2) 0.017(2) 
C7' 0.081(3) 0.112(4) 0.112(4) 0.034(3) -0.009(3) 0.020(3) 
C8' 0.121(4) 0.082(3) 0.097(3) 0.035(3) 0.007(3) -0.004(3) 
C9' 0.111(4) 0.079(3) 0.079(3) 0.013(2) 0.029(3) -0.002(3) 
C10' 0.076(3) 0.075(3) 0.066(2) 0.008(2) 0.019(2) 0.009(2) 
C11' 0.053(2) 0.053(2) 0.0490(19) 0.0007(16) 0.0113(16) 0.0067(17) 
C12' 0.055(2) 0.057(2) 0.0466(19) 0.0077(17) 0.0118(17) 0.0041(18) 
C13' 0.066(2) 0.082(3) 0.055(2) 0.0090(19) 0.0207(19) 0.002(2) 
C14' 0.061(3) 0.094(3) 0.075(3) 0.024(2) 0.022(2) 0.006(2) 
C15' 0.065(3) 0.071(3) 0.080(3) 0.009(2) 0.016(2) -0.006(2) 
C16' 0.060(2) 0.065(2) 0.069(2) -0.0067(18) 0.015(2) 0.003(2) 
C17' 0.067(2) 0.081(2) 0.0434(19) -0.0105(17) 0.0194(16) 0.015(2) 
N2 0.0589(18) 0.084(2) 0.0613(17) -0.0155(16) 0.0310(14) -0.0212(16) 
N2' 0.058(2) 0.171(3) 0.0516(18) 0.0061(19) 0.0106(17) -0.039(2) 
O4 0.0767(16) 0.0977(19) 0.0718(15) 0.0015(13) 0.0430(13) 0.0020(13) 
O5 0.0470(14) 0.0721(16) 0.0738(15) -0.0025(13) 0.0170(12) 0.0013(12) 
O6 0.0587(15) 0.0828(16) 0.0763(15) -0.0007(12) 0.0357(12) 0.0031(13) 
O4' 0.079(2) 0.256(4) 0.0596(17) -0.005(2) 0.0020(15) -0.055(2) 
O5' 0.0601(16) 0.114(2) 0.0866(18) 0.0001(16) 0.0183(14) -0.0238(15) 
O6' 0.0893(19) 0.102(2) 0.0677(17) -0.0076(15) 0.0094(13) -0.0222(16) 
C19 0.077(3) 0.090(3) 0.072(2) -0.017(2) 0.030(2) -0.024(2) 
C20 0.051(2) 0.089(3) 0.052(2) 0.001(2) 0.0176(17) -0.001(2) 
C21 0.049(2) 0.079(3) 0.060(2) -0.0032(19) 0.0164(17) 0.0026(19) 
C22 0.0438(19) 0.090(3) 0.056(2) -0.0123(19) 0.0196(16) -0.0107(18) 
C23 0.054(2) 0.065(2) 0.056(2) 0.0067(18) 0.0219(18) -0.001(2) 
C24 0.057(2) 0.081(3) 0.079(2) 0.002(2) 0.024(2) 0.000(2) 
C25 0.082(3) 0.087(3) 0.096(3) -0.014(2) 0.037(2) -0.021(2) 
C26 0.097(3) 0.076(3) 0.099(3) -0.004(2) 0.050(3) -0.001(3) 
C27 0.066(3) 0.079(3) 0.084(3) 0.011(2) 0.036(2) 0.004(2) 
C28 0.052(2) 0.077(3) 0.067(2) 0.008(2) 0.0253(17) 0.0005(19) 
C29 0.045(2) 0.071(2) 0.055(2) -0.0092(17) 0.0218(17) -0.0099(17) 
C30 0.051(2) 0.060(2) 0.063(2) -0.0060(17) 0.0255(18) -0.0073(17) 
C31 0.071(3) 0.083(3) 0.059(2) -0.0047(19) 0.0282(19) -0.008(2) 
C32 0.068(3) 0.092(3) 0.066(2) 0.007(2) 0.020(2) -0.001(2) 
C33 0.054(2) 0.087(3) 0.071(2) -0.001(2) 0.020(2) 0.0001(19) 
C34 0.054(2) 0.082(3) 0.069(2) -0.0100(19) 0.0275(19) -0.0091(19) 
C35 0.068(2) 0.102(3) 0.081(3) -0.023(2) 0.043(2) -0.013(2) 
C36 0.071(3) 0.105(3) 0.071(2) -0.005(2) 0.024(2) -0.025(2) 
C19' 0.065(3) 0.177(4) 0.054(2) 0.012(2) 0.010(2) -0.024(3) 
C20' 0.064(3) 0.176(5) 0.060(3) 0.011(3) 0.009(2) -0.040(3) 
C21' 0.060(3) 0.131(4) 0.079(3) 0.019(3) 0.008(2) -0.030(2) 
C22' 0.069(3) 0.119(3) 0.061(2) 0.003(2) 0.017(2) -0.035(2) 
C23' 0.074(3) 0.080(3) 0.074(3) 0.011(2) 0.014(2) 0.000(2) 
C24' 0.072(3) 0.109(3) 0.083(3) 0.017(2) 0.020(2) -0.022(3) 
C25' 0.094(3) 0.138(5) 0.100(4) 0.044(3) 0.045(3) 0.020(3) 
C26' 0.142(5) 0.098(4) 0.093(4) 0.037(3) 0.048(4) 0.049(4) 
C27' 0.114(4) 0.074(3) 0.109(4) 0.020(3) 0.022(3) 0.009(3) 
C28' 0.095(3) 0.083(3) 0.102(3) 0.008(3) 0.030(3) 0.001(3) 
C29' 0.050(2) 0.105(3) 0.055(2) -0.003(2) 0.0170(17) -0.028(2) 
C30' 0.051(2) 0.096(3) 0.064(3) -0.007(2) 0.0194(18) -0.014(2) 
C31' 0.055(2) 0.107(3) 0.054(2) 0.005(2) 0.0202(17) -0.004(2) 
C32' 0.055(2) 0.098(3) 0.092(3) 0.006(3) 0.038(2) 0.000(2) 
C33' 0.071(3) 0.101(3) 0.088(3) -0.008(3) 0.033(2) -0.018(2) 
C34' 0.070(3) 0.124(4) 0.063(2) -0.007(3) 0.021(2) -0.027(3) 
C35' 0.080(3) 0.111(3) 0.067(2) -0.019(2) 0.032(2) -0.027(2) 
  
_geom_special_details 
; 
 All esds (except the esd in the dihedral angle between two l.s. planes) 
 are estimated using the full covariance matrix.  The cell esds are taken 
 into account individually in the estimation of esds in distances, angles 
 and torsion angles; correlations between esds in cell parameters are only 
 used when they are defined by crystal symmetry.  An approximate (isotropic) 
 treatment of cell esds is used for estimating esds involving l.s. planes. 
; 
  
loop_ 
 _geom_bond_atom_site_label_1 
 _geom_bond_atom_site_label_2 
 _geom_bond_distance 
 _geom_bond_site_symmetry_2 
 _geom_bond_publ_flag 
N1 C2 1.347(3) . ? 
N1 C1 1.450(3) . ? 
N1 C4 1.481(3) . ? 
N1' C2' 1.348(4) . ? 
N1' C1' 1.451(3) . ? 
N1' C4' 1.470(3) . ? 
O1 C2 1.206(3) . ? 
O2 C5 1.369(3) . ? 
O2 C3 1.398(3) . ? 
O3 C12 1.376(3) . ? 
O3 C17 1.424(3) . ? 
O1' C2' 1.214(3) . ? 
O2' C5' 1.378(4) . ? 
O2' C3' 1.415(3) . ? 
O3' C12' 1.372(3) . ? 
O3' C17' 1.428(3) . ? 
C1 C18 1.508(4) . ? 
C1 H1A 0.9700 . ? 
C1 H1B 0.9700 . ? 
C2 C3 1.523(4) . ? 
C3 C4 1.565(4) . ? 
C3 H3 0.9800 . ? 
C4 C11 1.498(4) . ? 
C4 H4 0.9800 . ? 
C5 C6 1.371(4) . ? 
C5 C10 1.379(4) . ? 
C6 C7 1.376(4) . ? 
C6 H6 0.9300 . ? 
C7 C8 1.382(4) . ? 
C7 H7 0.9300 . ? 
C8 C9 1.371(4) . ? 
C8 H8 0.9300 . ? 
C9 C10 1.369(4) . ? 
C9 H9 0.9300 . ? 
C10 H10 0.9300 . ? 
C11 C12 1.396(4) . ? 
C11 C16 1.383(4) . ? 
C12 C13 1.380(4) . ? 
C13 C14 1.367(4) . ? 
C13 H13 0.9300 . ? 
C14 C15 1.375(4) . ? 
C14 H14 0.9300 . ? 
C15 C16 1.383(4) . ? 
C15 H15 0.9300 . ? 
C16 H16 0.9300 . ? 
C17 C17' 1.495(4) . ? 
C17 H17A 0.9700 . ? 
C17 H17B 0.9700 . ? 
C18 C1' 1.525(4) . ? 
C18 H18A 0.9700 . ? 
C18 H18B 0.9700 . ? 
C1' H1'1 0.9700 . ? 
C1' H1'2 0.9700 . ? 
C2' C3' 1.536(4) . ? 
C3' C4' 1.556(4) . ? 
C3' H3' 0.9800 . ? 
C4' C11' 1.499(4) . ? 
C4' H4' 0.9800 . ? 
C5' C10' 1.369(4) . ? 
C5' C6' 1.367(4) . ? 
C6' C7' 1.391(5) . ? 
C6' H6' 0.9300 . ? 
C7' C8' 1.383(5) . ? 
C7' H7' 0.9300 . ? 
C8' C9' 1.340(5) . ? 
C8' H8' 0.9300 . ? 
C9' C10' 1.377(4) . ? 
C9' H9' 0.9300 . ? 
C10' H10' 0.9300 . ? 
C11' C16' 1.383(4) . ? 
C11' C12' 1.391(4) . ? 
C12' C13' 1.383(4) . ? 
C13' C14' 1.382(4) . ? 
C13' H13' 0.9300 . ? 
C14' C15' 1.368(4) . ? 
C14' H14' 0.9300 . ? 
C15' C16' 1.377(4) . ? 
C15' H15' 0.9300 . ? 
C16' H16' 0.9300 . ? 
C17' H17C 0.9700 . ? 
C17' H17D 0.9700 . ? 
N2 C20 1.345(4) . ? 
N2 C19 1.461(4) . ? 
N2 C22 1.484(4) . ? 
N2' C20' 1.348(4) . ? 
N2' C22' 1.453(4) . ? 
N2' C19' 1.458(4) . ? 
O4 C20 1.220(3) . ? 
O5 C23 1.377(3) . ? 
O5 C21 1.407(3) . ? 
O6 C30 1.369(3) . ? 
O6 C35 1.424(3) . ? 
O4' C20' 1.211(4) . ? 
O5' C23' 1.379(4) . ? 
O5' C21' 1.412(4) . ? 
O6' C30' 1.361(4) . ? 
O6' C35' 1.431(3) . ? 
C19 C36 1.499(4) . ? 
C19 H19A 0.9700 . ? 
C19 H19B 0.9700 . ? 
C20 C21 1.523(4) . ? 
C21 C22 1.566(4) . ? 
C21 H21 0.9800 . ? 
C22 C29 1.490(4) . ? 
C22 H22 0.9800 . ? 
C23 C24 1.377(4) . ? 
C23 C28 1.377(4) . ? 
C24 C25 1.369(4) . ? 
C24 H24 0.9300 . ? 
C25 C26 1.375(5) . ? 
C25 H25 0.9300 . ? 
C26 C27 1.367(4) . ? 
C26 H26 0.9300 . ? 
C27 C28 1.383(4) . ? 
C27 H27 0.9300 . ? 
C28 H28 0.9300 . ? 
C29 C30 1.394(4) . ? 
C29 C34 1.381(4) . ? 
C30 C31 1.386(4) . ? 
C31 C32 1.375(4) . ? 
C31 H31 0.9300 . ? 
C32 C33 1.364(4) . ? 
C32 H32 0.9300 . ? 
C33 C34 1.372(4) . ? 
C33 H33 0.9300 . ? 
C34 H34 0.9300 . ? 
C35 C35' 1.495(4) . ? 
C35 H35A 0.9700 . ? 
C35 H35B 0.9700 . ? 
C36 C19' 1.488(4) . ? 
C36 H36A 0.9700 . ? 
C36 H36B 0.9700 . ? 
C19' H19C 0.9700 . ? 
C19' H19D 0.9700 . ? 
C20' C21' 1.521(5) . ? 
C21' C22' 1.557(4) . ? 
C21' H21' 0.9800 . ? 
C22' C29' 1.517(5) . ? 
C22' H22' 0.9800 . ? 
C23' C28' 1.371(5) . ? 
C23' C24' 1.381(5) . ? 
C24' C25' 1.377(5) . ? 
C24' H24' 0.9300 . ? 
C25' C26' 1.382(6) . ? 
C25' H25' 0.9300 . ? 
C26' C27' 1.370(6) . ? 
C26' H26' 0.9300 . ? 
C27' C28' 1.369(5) . ? 
C27' H27' 0.9300 . ? 
C28' H28' 0.9300 . ? 
C29' C34' 1.369(5) . ? 
C29' C30' 1.388(4) . ? 
C30' C31' 1.390(4) . ? 
C31' C32' 1.375(4) . ? 
C31' H31' 0.9300 . ? 
C32' C33' 1.357(5) . ? 
C32' H32' 0.9300 . ? 
C33' C34' 1.384(5) . ? 
C33' H33' 0.9300 . ? 
C34' H34' 0.9300 . ? 
C35' H35C 0.9700 . ? 
C35' H35D 0.9700 . ? 
  
loop_ 
 _geom_angle_atom_site_label_1 
 _geom_angle_atom_site_label_2 
 _geom_angle_atom_site_label_3 
 _geom_angle 
 _geom_angle_site_symmetry_1 
 _geom_angle_site_symmetry_3 
 _geom_angle_publ_flag 
C2 N1 C1 125.8(3) . . ? 
C2 N1 C4 95.9(2) . . ? 
C1 N1 C4 129.6(2) . . ? 
C2' N1' C1' 135.2(3) . . ? 
C2' N1' C4' 96.4(2) . . ? 
C1' N1' C4' 128.1(2) . . ? 
C5 O2 C3 119.4(2) . . ? 
C12 O3 C17 119.7(2) . . ? 
C5' O2' C3' 116.4(2) . . ? 
C12' O3' C17' 118.4(2) . . ? 
N1 C1 C18 114.6(2) . . ? 
N1 C1 H1A 108.6 . . ? 
C18 C1 H1A 108.6 . . ? 
N1 C1 H1B 108.6 . . ? 
C18 C1 H1B 108.6 . . ? 
H1A C1 H1B 107.6 . . ? 
O1 C2 N1 132.0(3) . . ? 
O1 C2 C3 135.6(3) . . ? 
N1 C2 C3 92.3(3) . . ? 
O2 C3 C2 113.3(3) . . ? 
O2 C3 C4 118.5(2) . . ? 
C2 C3 C4 85.8(2) . . ? 
O2 C3 H3 112.2 . . ? 
C2 C3 H3 112.2 . . ? 
C4 C3 H3 112.2 . . ? 
C11 C4 N1 117.5(2) . . ? 
C11 C4 C3 117.8(2) . . ? 
N1 C4 C3 85.8(2) . . ? 
C11 C4 H4 111.2 . . ? 
N1 C4 H4 111.2 . . ? 
C3 C4 H4 111.2 . . ? 
O2 C5 C6 115.4(3) . . ? 
O2 C5 C10 124.6(3) . . ? 
C6 C5 C10 120.0(3) . . ? 
C5 C6 C7 119.9(3) . . ? 
C5 C6 H6 120.0 . . ? 
C7 C6 H6 120.0 . . ? 
C6 C7 C8 120.6(3) . . ? 
C6 C7 H7 119.7 . . ? 
C8 C7 H7 119.7 . . ? 
C7 C8 C9 118.5(3) . . ? 
C7 C8 H8 120.7 . . ? 
C9 C8 H8 120.7 . . ? 
C10 C9 C8 121.5(3) . . ? 
C10 C9 H9 119.3 . . ? 
C8 C9 H9 119.3 . . ? 
C5 C10 C9 119.4(3) . . ? 
C5 C10 H10 120.3 . . ? 
C9 C10 H10 120.3 . . ? 
C12 C11 C16 117.3(3) . . ? 
C12 C11 C4 121.5(3) . . ? 
C16 C11 C4 121.1(3) . . ? 
O3 C12 C11 115.7(3) . . ? 
O3 C12 C13 122.7(3) . . ? 
C11 C12 C13 121.5(3) . . ? 
C12 C13 C14 119.2(3) . . ? 
C12 C13 H13 120.4 . . ? 
C14 C13 H13 120.4 . . ? 
C15 C14 C13 121.2(3) . . ? 
C15 C14 H14 119.4 . . ? 
C13 C14 H14 119.4 . . ? 
C14 C15 C16 118.9(3) . . ? 
C14 C15 H15 120.5 . . ? 
C16 C15 H15 120.5 . . ? 
C11 C16 C15 121.8(3) . . ? 
C11 C16 H16 119.1 . . ? 
C15 C16 H16 119.1 . . ? 
O3 C17 C17' 113.5(3) . . ? 
O3 C17 H17A 108.9 . . ? 
C17' C17 H17A 108.9 . . ? 
O3 C17 H17B 108.9 . . ? 
C17' C17 H17B 108.9 . . ? 
H17A C17 H17B 107.7 . . ? 
C1' C18 C1 110.3(2) . . ? 
C1' C18 H18A 109.6 . . ? 
C1 C18 H18A 109.6 . . ? 
C1' C18 H18B 109.6 . . ? 
C1 C18 H18B 109.6 . . ? 
H18A C18 H18B 108.1 . . ? 
N1' C1' C18 111.4(2) . . ? 
N1' C1' H1'1 109.3 . . ? 
C18 C1' H1'1 109.3 . . ? 
N1' C1' H1'2 109.3 . . ? 
C18 C1' H1'2 109.3 . . ? 
H1'1 C1' H1'2 108.0 . . ? 
O1' C2' N1' 132.8(3) . . ? 
O1' C2' C3' 135.6(3) . . ? 
N1' C2' C3' 91.6(2) . . ? 
O2' C3' C2' 116.6(2) . . ? 
O2' C3' C4' 114.4(2) . . ? 
C2' C3' C4' 85.6(2) . . ? 
O2' C3' H3' 112.5 . . ? 
C2' C3' H3' 112.5 . . ? 
C4' C3' H3' 112.5 . . ? 
N1' C4' C11' 114.3(3) . . ? 
N1' C4' C3' 86.4(2) . . ? 
C11' C4' C3' 121.5(2) . . ? 
N1' C4' H4' 110.8 . . ? 
C11' C4' H4' 110.8 . . ? 
C3' C4' H4' 110.8 . . ? 
C10' C5' O2' 124.5(3) . . ? 
C10' C5' C6' 120.1(4) . . ? 
O2' C5' C6' 115.4(3) . . ? 
C5' C6' C7' 119.2(4) . . ? 
C5' C6' H6' 120.4 . . ? 
C7' C6' H6' 120.4 . . ? 
C8' C7' C6' 120.1(4) . . ? 
C8' C7' H7' 119.9 . . ? 
C6' C7' H7' 119.9 . . ? 
C9' C8' C7' 119.6(4) . . ? 
C9' C8' H8' 120.2 . . ? 
C7' C8' H8' 120.2 . . ? 
C8' C9' C10' 120.9(4) . . ? 
C8' C9' H9' 119.5 . . ? 
C10' C9' H9' 119.5 . . ? 
C5' C10' C9' 120.0(4) . . ? 
C5' C10' H10' 120.0 . . ? 
C9' C10' H10' 120.0 . . ? 
C16' C11' C12' 118.5(3) . . ? 
C16' C11' C4' 121.3(3) . . ? 
C12' C11' C4' 120.1(3) . . ? 
O3' C12' C13' 123.9(3) . . ? 
O3' C12' C11' 115.6(3) . . ? 
C13' C12' C11' 120.5(3) . . ? 
C12' C13' C14' 119.7(3) . . ? 
C12' C13' H13' 120.1 . . ? 
C14' C13' H13' 120.1 . . ? 
C13' C14' C15' 120.4(3) . . ? 
C13' C14' H14' 119.8 . . ? 
C15' C14' H14' 119.8 . . ? 
C14' C15' C16' 119.8(3) . . ? 
C14' C15' H15' 120.1 . . ? 
C16' C15' H15' 120.1 . . ? 
C11' C16' C15' 121.2(3) . . ? 
C11' C16' H16' 119.4 . . ? 
C15' C16' H16' 119.4 . . ? 
O3' C17' C17 107.2(2) . . ? 
O3' C17' H17C 110.3 . . ? 
C17 C17' H17C 110.3 . . ? 
O3' C17' H17D 110.3 . . ? 
C17 C17' H17D 110.3 . . ? 
H17C C17' H17D 108.5 . . ? 
C20 N2 C19 132.4(3) . . ? 
C20 N2 C22 95.9(3) . . ? 
C19 N2 C22 131.7(3) . . ? 
C20' N2' C22' 97.0(3) . . ? 
C20' N2' C19' 132.4(3) . . ? 
C22' N2' C19' 129.0(3) . . ? 
C23 O5 C21 117.9(2) . . ? 
C30 O6 C35 119.7(3) . . ? 
C23' O5' C21' 117.3(3) . . ? 
C30' O6' C35' 118.3(3) . . ? 
N2 C19 C36 112.2(3) . . ? 
N2 C19 H19A 109.2 . . ? 
C36 C19 H19A 109.2 . . ? 
N2 C19 H19B 109.2 . . ? 
C36 C19 H19B 109.2 . . ? 
H19A C19 H19B 107.9 . . ? 
O4 C20 N2 132.4(3) . . ? 
O4 C20 C21 135.3(3) . . ? 
N2 C20 C21 92.2(3) . . ? 
O5 C21 C20 114.2(3) . . ? 
O5 C21 C22 118.3(2) . . ? 
C20 C21 C22 85.8(2) . . ? 
O5 C21 H21 112.0 . . ? 
C20 C21 H21 112.0 . . ? 
C22 C21 H21 112.0 . . ? 
N2 C22 C29 114.0(3) . . ? 
N2 C22 C21 85.5(2) . . ? 
C29 C22 C21 117.1(3) . . ? 
N2 C22 H22 112.5 . . ? 
C29 C22 H22 112.5 . . ? 
C21 C22 H22 112.5 . . ? 
O5 C23 C24 115.6(3) . . ? 
O5 C23 C28 124.2(3) . . ? 
C24 C23 C28 120.2(3) . . ? 
C25 C24 C23 119.8(3) . . ? 
C25 C24 H24 120.1 . . ? 
C23 C24 H24 120.1 . . ? 
C24 C25 C26 120.8(4) . . ? 
C24 C25 H25 119.6 . . ? 
C26 C25 H25 119.6 . . ? 
C27 C26 C25 118.9(4) . . ? 
C27 C26 H26 120.5 . . ? 
C25 C26 H26 120.5 . . ? 
C26 C27 C28 121.3(3) . . ? 
C26 C27 H27 119.3 . . ? 
C28 C27 H27 119.3 . . ? 
C23 C28 C27 118.8(3) . . ? 
C23 C28 H28 120.6 . . ? 
C27 C28 H28 120.6 . . ? 
C30 C29 C34 117.5(3) . . ? 
C30 C29 C22 120.2(3) . . ? 
C34 C29 C22 122.3(3) . . ? 
O6 C30 C29 115.7(3) . . ? 
O6 C30 C31 123.9(3) . . ? 
C29 C30 C31 120.4(3) . . ? 
C30 C31 C32 120.0(3) . . ? 
C30 C31 H31 120.0 . . ? 
C32 C31 H31 120.0 . . ? 
C33 C32 C31 120.6(3) . . ? 
C33 C32 H32 119.7 . . ? 
C31 C32 H32 119.7 . . ? 
C32 C33 C34 119.2(3) . . ? 
C32 C33 H33 120.4 . . ? 
C34 C33 H33 120.4 . . ? 
C29 C34 C33 122.4(3) . . ? 
C29 C34 H34 118.8 . . ? 
C33 C34 H34 118.8 . . ? 
O6 C35 C35' 112.4(3) . . ? 
O6 C35 H35A 109.1 . . ? 
C35' C35 H35A 109.1 . . ? 
O6 C35 H35B 109.1 . . ? 
C35' C35 H35B 109.1 . . ? 
H35A C35 H35B 107.8 . . ? 
C19 C36 C19' 112.9(3) . . ? 
C19 C36 H36A 109.0 . . ? 
C19' C36 H36A 109.0 . . ? 
C19 C36 H36B 109.0 . . ? 
C19' C36 H36B 109.0 . . ? 
H36A C36 H36B 107.8 . . ? 
N2' C19' C36 112.0(3) . . ? 
N2' C19' H19C 109.2 . . ? 
C36 C19' H19C 109.2 . . ? 
N2' C19' H19D 109.2 . . ? 
C36 C19' H19D 109.2 . . ? 
H19C C19' H19D 107.9 . . ? 
O4' C20' N2' 133.0(4) . . ? 
O4' C20' C21' 136.6(4) . . ? 
N2' C20' C21' 90.4(3) . . ? 
O5' C21' C20' 115.3(3) . . ? 
O5' C21' C22' 120.9(3) . . ? 
C20' C21' C22' 86.0(3) . . ? 
O5' C21' H21' 110.8 . . ? 
C20' C21' H21' 110.8 . . ? 
C22' C21' H21' 110.8 . . ? 
N2' C22' C29' 113.9(3) . . ? 
N2' C22' C21' 85.2(3) . . ? 
C29' C22' C21' 115.0(3) . . ? 
N2' C22' H22' 113.3 . . ? 
C29' C22' H22' 113.3 . . ? 
C21' C22' H22' 113.3 . . ? 
C28' C23' O5' 123.6(4) . . ? 
C28' C23' C24' 120.9(4) . . ? 
O5' C23' C24' 115.4(4) . . ? 
C25' C24' C23' 118.8(4) . . ? 
C25' C24' H24' 120.6 . . ? 
C23' C24' H24' 120.6 . . ? 
C26' C25' C24' 120.8(5) . . ? 
C26' C25' H25' 119.6 . . ? 
C24' C25' H25' 119.6 . . ? 
C25' C26' C27' 119.0(5) . . ? 
C25' C26' H26' 120.5 . . ? 
C27' C26' H26' 120.5 . . ? 
C28' C27' C26' 121.2(5) . . ? 
C28' C27' H27' 119.4 . . ? 
C26' C27' H27' 119.4 . . ? 
C23' C28' C27' 119.3(4) . . ? 
C23' C28' H28' 120.4 . . ? 
C27' C28' H28' 120.4 . . ? 
C34' C29' C30' 117.9(4) . . ? 
C34' C29' C22' 121.4(3) . . ? 
C30' C29' C22' 120.6(4) . . ? 
O6' C30' C31' 124.2(3) . . ? 
O6' C30' C29' 115.7(4) . . ? 
C31' C30' C29' 120.1(4) . . ? 
C32' C31' C30' 119.8(3) . . ? 
C32' C31' H31' 120.1 . . ? 
C30' C31' H31' 120.1 . . ? 
C31' C32' C33' 121.1(4) . . ? 
C31' C32' H32' 119.5 . . ? 
C33' C32' H32' 119.5 . . ? 
C32' C33' C34' 118.5(4) . . ? 
C32' C33' H33' 120.8 . . ? 
C34' C33' H33' 120.8 . . ? 
C29' C34' C33' 122.6(4) . . ? 
C29' C34' H34' 118.7 . . ? 
C33' C34' H34' 118.7 . . ? 
O6' C35' C35 106.5(3) . . ? 
O6' C35' H35C 110.4 . . ? 
C35 C35' H35C 110.4 . . ? 
O6' C35' H35D 110.4 . . ? 
C35 C35' H35D 110.4 . . ? 
H35C C35' H35D 108.6 . . ? 
  
loop_ 
 _geom_torsion_atom_site_label_1 
 _geom_torsion_atom_site_label_2 
 _geom_torsion_atom_site_label_3 
 _geom_torsion_atom_site_label_4 
 _geom_torsion 
 _geom_torsion_site_symmetry_1 
 _geom_torsion_site_symmetry_2 
 _geom_torsion_site_symmetry_3 
 _geom_torsion_site_symmetry_4 
 _geom_torsion_publ_flag 
C2 N1 C1 C18 -153.5(3) . . . . ? 
C4 N1 C1 C18 66.7(4) . . . . ? 
C1 N1 C2 O1 24.2(6) . . . . ? 
C4 N1 C2 O1 174.2(4) . . . . ? 
C1 N1 C2 C3 -153.2(3) . . . . ? 
C4 N1 C2 C3 -3.2(2) . . . . ? 
C5 O2 C3 C2 -164.5(2) . . . . ? 
C5 O2 C3 C4 97.2(3) . . . . ? 
O1 C2 C3 O2 66.4(5) . . . . ? 
N1 C2 C3 O2 -116.3(3) . . . . ? 
O1 C2 C3 C4 -174.2(4) . . . . ? 
N1 C2 C3 C4 3.0(2) . . . . ? 
C2 N1 C4 C11 122.4(3) . . . . ? 
C1 N1 C4 C11 -89.4(3) . . . . ? 
C2 N1 C4 C3 3.1(2) . . . . ? 
C1 N1 C4 C3 151.3(3) . . . . ? 
O2 C3 C4 C11 -7.4(4) . . . . ? 
C2 C3 C4 C11 -121.7(3) . . . . ? 
O2 C3 C4 N1 111.6(3) . . . . ? 
C2 C3 C4 N1 -2.7(2) . . . . ? 
C3 O2 C5 C6 172.8(2) . . . . ? 
C3 O2 C5 C10 -5.0(4) . . . . ? 
O2 C5 C6 C7 -175.3(3) . . . . ? 
C10 C5 C6 C7 2.6(4) . . . . ? 
C5 C6 C7 C8 -0.9(4) . . . . ? 
C6 C7 C8 C9 -1.1(5) . . . . ? 
C7 C8 C9 C10 1.3(5) . . . . ? 
O2 C5 C10 C9 175.3(3) . . . . ? 
C6 C5 C10 C9 -2.4(4) . . . . ? 
C8 C9 C10 C5 0.4(5) . . . . ? 
N1 C4 C11 C12 136.4(3) . . . . ? 
C3 C4 C11 C12 -123.2(3) . . . . ? 
N1 C4 C11 C16 -48.3(4) . . . . ? 
C3 C4 C11 C16 52.2(4) . . . . ? 
C17 O3 C12 C11 -162.7(2) . . . . ? 
C17 O3 C12 C13 18.4(4) . . . . ? 
C16 C11 C12 O3 -179.4(2) . . . . ? 
C4 C11 C12 O3 -3.9(4) . . . . ? 
C16 C11 C12 C13 -0.5(4) . . . . ? 
C4 C11 C12 C13 175.0(3) . . . . ? 
O3 C12 C13 C14 178.5(3) . . . . ? 
C11 C12 C13 C14 -0.3(4) . . . . ? 
C12 C13 C14 C15 1.1(5) . . . . ? 
C13 C14 C15 C16 -1.1(5) . . . . ? 
C12 C11 C16 C15 0.5(4) . . . . ? 
C4 C11 C16 C15 -175.0(3) . . . . ? 
C14 C15 C16 C11 0.2(5) . . . . ? 
C12 O3 C17 C17' 66.2(3) . . . . ? 
N1 C1 C18 C1' -172.7(2) . . . . ? 
C2' N1' C1' C18 -122.5(3) . . . . ? 
C4' N1' C1' C18 49.8(4) . . . . ? 
C1 C18 C1' N1' 65.4(3) . . . . ? 
C1' N1' C2' O1' -4.9(6) . . . . ? 
C4' N1' C2' O1' -178.8(3) . . . . ? 
C1' N1' C2' C3' 174.3(3) . . . . ? 
C4' N1' C2' C3' 0.4(2) . . . . ? 
C5' O2' C3' C2' 93.3(3) . . . . ? 
C5' O2' C3' C4' -169.0(2) . . . . ? 
O1' C2' C3' O2' -66.0(5) . . . . ? 
N1' C2' C3' O2' 114.8(3) . . . . ? 
O1' C2' C3' C4' 178.8(4) . . . . ? 
N1' C2' C3' C4' -0.4(2) . . . . ? 
C2' N1' C4' C11' -123.5(3) . . . . ? 
C1' N1' C4' C11' 62.0(4) . . . . ? 
C2' N1' C4' C3' -0.4(2) . . . . ? 
C1' N1' C4' C3' -174.9(3) . . . . ? 
O2' C3' C4' N1' -117.0(3) . . . . ? 
C2' C3' C4' N1' 0.3(2) . . . . ? 
O2' C3' C4' C11' -0.6(4) . . . . ? 
C2' C3' C4' C11' 116.7(3) . . . . ? 
C3' O2' C5' C10' -15.7(4) . . . . ? 
C3' O2' C5' C6' 165.0(3) . . . . ? 
C10' C5' C6' C7' -0.6(5) . . . . ? 
O2' C5' C6' C7' 178.7(3) . . . . ? 
C5' C6' C7' C8' -0.4(6) . . . . ? 
C6' C7' C8' C9' 1.4(7) . . . . ? 
C7' C8' C9' C10' -1.5(6) . . . . ? 
O2' C5' C10' C9' -178.7(3) . . . . ? 
C6' C5' C10' C9' 0.6(5) . . . . ? 
C8' C9' C10' C5' 0.5(6) . . . . ? 
N1' C4' C11' C16' 41.4(4) . . . . ? 
C3' C4' C11' C16' -59.8(4) . . . . ? 
N1' C4' C11' C12' -134.4(3) . . . . ? 
C3' C4' C11' C12' 124.4(3) . . . . ? 
C17' O3' C12' C13' -10.4(4) . . . . ? 
C17' O3' C12' C11' 169.8(2) . . . . ? 
C16' C11' C12' O3' 179.5(2) . . . . ? 
C4' C11' C12' O3' -4.5(4) . . . . ? 
C16' C11' C12' C13' -0.2(4) . . . . ? 
C4' C11' C12' C13' 175.7(3) . . . . ? 
O3' C12' C13' C14' -179.1(3) . . . . ? 
C11' C12' C13' C14' 0.7(4) . . . . ? 
C12' C13' C14' C15' -0.1(5) . . . . ? 
C13' C14' C15' C16' -0.8(5) . . . . ? 
C12' C11' C16' C15' -0.7(4) . . . . ? 
C4' C11' C16' C15' -176.6(3) . . . . ? 
C14' C15' C16' C11' 1.3(5) . . . . ? 
C12' O3' C17' C17 -178.2(2) . . . . ? 
O3 C17 C17' O3' 58.2(3) . . . . ? 
C20 N2 C19 C36 137.7(3) . . . . ? 
C22 N2 C19 C36 -44.7(4) . . . . ? 
C19 N2 C20 O4 3.1(6) . . . . ? 
C22 N2 C20 O4 -175.1(3) . . . . ? 
C19 N2 C20 C21 -175.7(3) . . . . ? 
C22 N2 C20 C21 6.1(2) . . . . ? 
C23 O5 C21 C20 -168.4(3) . . . . ? 
C23 O5 C21 C22 92.9(3) . . . . ? 
O4 C20 C21 O5 56.3(5) . . . . ? 
N2 C20 C21 O5 -124.9(3) . . . . ? 
O4 C20 C21 C22 175.5(4) . . . . ? 
N2 C20 C21 C22 -5.7(2) . . . . ? 
C20 N2 C22 C29 111.8(3) . . . . ? 
C19 N2 C22 C29 -66.4(4) . . . . ? 
C20 N2 C22 C21 -5.9(2) . . . . ? 
C19 N2 C22 C21 175.9(3) . . . . ? 
O5 C21 C22 N2 120.5(3) . . . . ? 
C20 C21 C22 N2 5.2(2) . . . . ? 
O5 C21 C22 C29 5.7(4) . . . . ? 
C20 C21 C22 C29 -109.5(3) . . . . ? 
C21 O5 C23 C24 174.0(3) . . . . ? 
C21 O5 C23 C28 -6.2(4) . . . . ? 
O5 C23 C24 C25 -178.2(3) . . . . ? 
C28 C23 C24 C25 1.9(5) . . . . ? 
C23 C24 C25 C26 -0.6(5) . . . . ? 
C24 C25 C26 C27 -0.1(6) . . . . ? 
C25 C26 C27 C28 -0.6(5) . . . . ? 
O5 C23 C28 C27 177.6(3) . . . . ? 
C24 C23 C28 C27 -2.5(4) . . . . ? 
C26 C27 C28 C23 1.9(5) . . . . ? 
N2 C22 C29 C30 153.0(3) . . . . ? 
C21 C22 C29 C30 -109.4(3) . . . . ? 
N2 C22 C29 C34 -26.9(4) . . . . ? 
C21 C22 C29 C34 70.7(4) . . . . ? 
C35 O6 C30 C29 -156.6(3) . . . . ? 
C35 O6 C30 C31 24.2(4) . . . . ? 
C34 C29 C30 O6 -177.8(3) . . . . ? 
C22 C29 C30 O6 2.3(4) . . . . ? 
C34 C29 C30 C31 1.3(4) . . . . ? 
C22 C29 C30 C31 -178.6(3) . . . . ? 
O6 C30 C31 C32 177.2(3) . . . . ? 
C29 C30 C31 C32 -1.9(5) . . . . ? 
C30 C31 C32 C33 1.3(5) . . . . ? 
C31 C32 C33 C34 -0.1(5) . . . . ? 
C30 C29 C34 C33 -0.2(5) . . . . ? 
C22 C29 C34 C33 179.7(3) . . . . ? 
C32 C33 C34 C29 -0.4(5) . . . . ? 
C30 O6 C35 C35' 65.8(4) . . . . ? 
N2 C19 C36 C19' -65.4(4) . . . . ? 
C20' N2' C19' C36 146.9(4) . . . . ? 
C22' N2' C19' C36 -51.5(6) . . . . ? 
C19 C36 C19' N2' 161.7(3) . . . . ? 
C22' N2' C20' O4' 171.3(5) . . . . ? 
C19' N2' C20' O4' -23.0(9) . . . . ? 
C22' N2' C20' C21' -9.8(3) . . . . ? 
C19' N2' C20' C21' 155.9(4) . . . . ? 
C23' O5' C21' C20' 176.5(3) . . . . ? 
C23' O5' C21' C22' -82.4(5) . . . . ? 
O4' C20' C21' O5' -49.7(7) . . . . ? 
N2' C20' C21' O5' 131.5(3) . . . . ? 
O4' C20' C21' C22' -172.1(6) . . . . ? 
N2' C20' C21' C22' 9.1(3) . . . . ? 
C20' N2' C22' C29' -105.7(3) . . . . ? 
C19' N2' C22' C29' 87.9(5) . . . . ? 
C20' N2' C22' C21' 9.6(3) . . . . ? 
C19' N2' C22' C21' -156.8(4) . . . . ? 
O5' C21' C22' N2' -125.7(4) . . . . ? 
C20' C21' C22' N2' -8.5(3) . . . . ? 
O5' C21' C22' C29' -11.5(6) . . . . ? 
C20' C21' C22' C29' 105.8(4) . . . . ? 
C21' O5' C23' C28' 18.0(5) . . . . ? 
C21' O5' C23' C24' -164.6(3) . . . . ? 
C28' C23' C24' C25' -1.4(6) . . . . ? 
O5' C23' C24' C25' -178.9(3) . . . . ? 
C23' C24' C25' C26' 1.5(6) . . . . ? 
C24' C25' C26' C27' -1.2(6) . . . . ? 
C25' C26' C27' C28' 0.8(6) . . . . ? 
O5' C23' C28' C27' 178.4(3) . . . . ? 
C24' C23' C28' C27' 1.1(6) . . . . ? 
C26' C27' C28' C23' -0.8(6) . . . . ? 
N2' C22' C29' C34' 39.7(4) . . . . ? 
C21' C22' C29' C34' -56.4(5) . . . . ? 
N2' C22' C29' C30' -141.4(3) . . . . ? 
C21' C22' C29' C30' 122.5(4) . . . . ? 
C35' O6' C30' C31' -15.6(5) . . . . ? 
C35' O6' C30' C29' 165.1(3) . . . . ? 
C34' C29' C30' O6' 179.6(3) . . . . ? 
C22' C29' C30' O6' 0.7(5) . . . . ? 
C34' C29' C30' C31' 0.3(5) . . . . ? 
C22' C29' C30' C31' -178.6(3) . . . . ? 
O6' C30' C31' C32' -178.5(3) . . . . ? 
C29' C30' C31' C32' 0.8(5) . . . . ? 
C30' C31' C32' C33' -1.6(5) . . . . ? 
C31' C32' C33' C34' 1.2(5) . . . . ? 
C30' C29' C34' C33' -0.6(5) . . . . ? 
C22' C29' C34' C33' 178.3(3) . . . . ? 
C32' C33' C34' C29' -0.1(5) . . . . ? 
C30' O6' C35' C35 -163.1(3) . . . . ? 
O6 C35 C35' O6' 62.4(4) . . . . ? 
  
_diffrn_measured_fraction_theta_max    0.999 
_diffrn_reflns_theta_full              25.00 
_diffrn_measured_fraction_theta_full   0.999 
_refine_diff_density_max    0.264 
_refine_diff_density_min   -0.155 
_refine_diff_density_rms    0.034 
  
